# Supplementary material for: Potential Polyunsaturated Aldehydes in the Strait of Gibraltar under Two Tidal Regimes
Source: PubMed Central journal article supplement (PMC3967220; doi:10.3390/md12031438), 2014-03-13

## Supplementary Information

**Table S1.** Results by sampling site obtained during Spring Tide regime. Data account for the sampling sites where plankton community was analyzed by Flow CAM methodology.

| Spring Tides                                                                                                                                                   |           |       |      |           |      |       |      |      |      |           |       |         |      |       |       |       |       |       |
|----------------------------------------------------------------------------------------------------------------------------------------------------------------|-----------|-------|------|-----------|------|-------|------|------|------|-----------|-------|---------|------|-------|-------|-------|-------|-------|
| Stations                                                                                                                                                       | 1         | 3     | 5    | 6         | 8    | 9     | 10   | 12   | 13   | 14        | 17    | 23      | 24   | 25    | 26    | 27    | 28    | 41    |
| <b>Diatom cell densities (<math>\times 10^3</math> cell L<sup>-1</sup>) and biovolume (<math>\times 10^6</math> <math>\mu\text{m}^3</math> L<sup>-1</sup>)</b> |           |       |      |           |      |       |      |      |      |           |       |         |      |       |       |       |       |       |
| <b>Abundance</b>                                                                                                                                               | 50.9      | 2.0   | 0.7  | 9.5       | 1.7  | 2.0   | 0.5  | 0.7  | 2.6  | 10.2      | 0.3   | 5.9     | 0.7  | 7.6   | 1.5   | 1.6   | 5.1   | 0.9   |
| <b>Biovolume</b>                                                                                                                                               | 6,350,626 | 88.3  | 71.8 | 1,428,711 | 71.3 | 324.4 | 8.5  | 8.4  | 89.0 | 2,298,395 | 9.0   | 211,611 | 25.8 | 513.0 | 89.2  | 121.4 | 619.3 | 102.3 |
| <b>% Microplanktonic community (abundance)</b>                                                                                                                 |           |       |      |           |      |       |      |      |      |           |       |         |      |       |       |       |       |       |
| <b>Diatoms</b>                                                                                                                                                 | 95.9      | 63.9  | 68.5 | 87.2      | 79.7 | 80.7  | 54.6 | 51.1 | 89.4 | 82.2      | 54.8  | 93.8    | 84.3 | 88.9  | 69.9  | 66.5  | 89.3  | 68.8  |
| <b>Dinoflagellates</b>                                                                                                                                         | 2.0       | 8.7   | 20.5 | 9.5       | 16.2 | 12.3  | 21.0 | 11.3 | 5.4  | 3.6       | 24.9  | 5.0     | 10.7 | 8.1   | 18.6  | 19.6  | 7.8   | 23.8  |
| <b>Grazers</b>                                                                                                                                                 | 0.5       | 0.3   | 1.4  | 1.1       | 2.4  | 1.2   | 1.9  | 1.8  | 0.0  | 0.3       | 4.5   | 0.4     | 2.2  | 0.3   | 1.7   | 0.5   | 1.1   | 4.7   |
| <b>% Microplanktonic community (biovolume)</b>                                                                                                                 |           |       |      |           |      |       |      |      |      |           |       |         |      |       |       |       |       |       |
| <b>Diatoms</b>                                                                                                                                                 | 99.6      | 85.7  | 65.7 | 99.9      | 28.6 | 72.8  | 30.8 | 19.5 | 74.3 | 99.9      | 20.6  | 99.9    | 51.5 | 73.5  | 46.7  | 54.9  | 87.2  | 50.3  |
| <b>Dinoflagellates</b>                                                                                                                                         | 0.3       | 8.3   | 12.9 | 0.0       | 42.8 | 16.0  | 7.0  | 11.7 | 13.5 | 0.0       | 28.3  | 0.0     | 34.3 | 10.7  | 25.0  | 16.9  | 2.9   | 13.9  |
| <b>Grazers</b>                                                                                                                                                 | 0.00      | 2.2   | 3.8  | 0.0       | 28.3 | 10.0  | 39.9 | 22.3 | 5.5  | 0.0       | 46.9  | 0.0     | 10.5 | 12.9  | 23.8  | 22.3  | 7.5   | 25.3  |
| <b>pPUAs from cells from 1 L</b>                                                                                                                               |           |       |      |           |      |       |      |      |      |           |       |         |      |       |       |       |       |       |
| <b>HD</b>                                                                                                                                                      | 1.9       | 0.2   | 0.5  | 0.9       | 0.9  | 1.05  | 1.4  | 0.3  | 0.3  | 0.4       | 0.1   | 0.5     | 0.02 | 0.03  | 0.8   | 0.5   | 0.8   | 0.02  |
| <b>OD</b>                                                                                                                                                      | 3.1       | 0.01  | 0.00 | 1.1       | 0.2  | 0.2   | 1.2  | 0.02 | 0.1  | 0.2       | 0.00  | 1.2     | 0.1  | 0.05  | 0.00  | 0.06  | 0.2   | 0.005 |
| <b>DD</b>                                                                                                                                                      | 6.3       | 0.09  | 0.4  | 1.5       | 1.9  | 1.6   | 2.4  | 1.4  | 1.1  | 1.2       | 0.01  | 1.8     | 1.6  | 1.4   | 1.4   | 1.6   | 1.5   | 0.02  |
| <b>Total PUAs</b>                                                                                                                                              | 11.4      | 0.3   | 0.9  | 3.7       | 3.2  | 3.0   | 5.0  | 1.7  | 1.6  | 1.8       | 0.1   | 3.6     | 1.8  | 1.5   | 2.3   | 2.2   | 2.6   | 0.05  |
| <b>PUAs per cells (fmol cell<sup>-1</sup>)</b>                                                                                                                 |           |       |      |           |      |       |      |      |      |           |       |         |      |       |       |       |       |       |
| <b>HD</b>                                                                                                                                                      | 0.03      | 0.1   | 0.6  | 0.1       | 0.5  | 0.5   | 2.7  | 0.4  | 0.1  | 0.04      | 0.3   | 0.09    | 0.03 | 0.004 | 0.5   | 0.3   | 0.1   | 0.02  |
| <b>OD</b>                                                                                                                                                      | 0.06      | 0.006 | 0.01 | 0.1       | 0.1  | 0.1   | 2.3  | 0.03 | 0.04 | 0.02      | 0.001 | 0.2     | 0.2  | 0.007 | 0.003 | 0.03  | 0.04  | 0.005 |
| <b>DD</b>                                                                                                                                                      | 0.1       | 0.04  | 0.5  | 0.1       | 1.1  | 0.8   | 4.7  | 1.9  | 0.4  | 0.1       | 0.05  | 0.3     | 2.0  | 0.1   | 0.9   | 1.0   | 0.2   | 0.02  |
| <b>Total PUAs</b>                                                                                                                                              | 0.2       | 0.1   | 1.2  | 0.3       | 1.7  | 1.4   | 9.8  | 2.3  | 0.6  | 0.1       | 0.3   | 0.6     | 2.3  | 0.2   | 1.5   | 1.3   | 0.5   | 0.05  |

Table S1. Cont.

| Spring Tides                         |      |      |     |      |      |      |      |      |      |      |      |      |      |      |      |      |      |      |
|--------------------------------------|------|------|-----|------|------|------|------|------|------|------|------|------|------|------|------|------|------|------|
| Stations                             | 1    | 3    | 5   | 6    | 8    | 9    | 10   | 12   | 13   | 14   | 17   | 23   | 24   | 25   | 26   | 27   | 28   | 41   |
| Chlorophyll ( $\mu\text{g L}^{-1}$ ) |      |      |     |      |      |      |      |      |      |      |      |      |      |      |      |      |      |      |
| Chla > 20 $\mu\text{m}$              | 0    | 0.02 | 0   | 0.3  | 0.06 | 0.04 | 0.01 | 0.01 | 0.1  | 0.2  | 0.04 | 0.3  | 0.07 | 0.2  | 0.04 | 0.09 | 0.2  | 0.07 |
| Chla Total                           | 4.2  | 0.1  | 0.4 | 2.1  | 0.5  | 0.2  | 0.4  | 0.3  | 0.9  | 3.9  | 0.4  | 2.3  | 1.0  | 1.5  | 1.1  | 1.3  | 1.4  | 1.0  |
| % Active                             | 65.0 | 0    | 0   | 54.9 | 19.8 | 0    | 22.2 | 17.3 | 30.7 | 49.6 | 0    | 46.6 | 17.1 | 22.1 | 23.6 | 18.3 | 34.6 | 27.3 |
| Chlorophyll                          |      |      |     |      |      |      |      |      |      |      |      |      |      |      |      |      |      |      |
| Nutrients ( $\mu\text{M}$ )          |      |      |     |      |      |      |      |      |      |      |      |      |      |      |      |      |      |      |
| Nitrate                              | 0.8  | 0.5  | 2.5 | 1.2  | 3.8  | 0.2  | 1.0  | 3.1  | 2.1  | 2.4  | -    | 2.2  | 1.4  | 0.9  | 0.4  | 0.2  | 1.6  | 1.7  |
| Phosphate                            | nd   | 0.09 | nd  | nd   | nd   | nd   | nd   | nd   | nd   | nd   | -    | nd   | nd   | nd   | nd   | 0.3  | 0.1  | nd   |
| Silicate                             | 1.5  | 1.0  | 4.6 | 3.5  | 3.0  | 2.8  | 2.2  | 1.9  | 3.3  | 3.7  | -    | 1.2  | 1.0  | 0.7  | 0.8  | 1.1  | 2.0  | 1.7  |

Table S2. Results by sampling site obtained during Neap Tide regime. Data account for the sampling sites where plankton community was analyzed by Flow CAM methodology.

| Neap Tides                                                                                                               |      |      |       |       |      |      |       |       |      |      |       |       |      |      |       |  |
|--------------------------------------------------------------------------------------------------------------------------|------|------|-------|-------|------|------|-------|-------|------|------|-------|-------|------|------|-------|--|
| Stations                                                                                                                 | 1    | 5    | 6     | 8     | 9    | 10   | 14    | 19    | 23   | 24   | 25    | 26    | 28   | 36   | 41    |  |
| Diatom cell densities ( $\times 10^3 \text{ cell L}^{-1}$ ) and biovolume ( $\times 10^6 \mu\text{m}^3 \text{ L}^{-1}$ ) |      |      |       |       |      |      |       |       |      |      |       |       |      |      |       |  |
| Abundance                                                                                                                | 1.1  | 0.3  | 5.9   | 6.8   | 1.2  | 0.4  | 11.3  | 5.6   | 1.1  | 0.9  | 1.8   | 5.1   | 0.6  | 0.2  | 1.0   |  |
| Biovolume                                                                                                                | 26.4 | 2.1  | 996.7 | 952.1 | 86.2 | 14.6 | 784.5 | 186.6 | 40.7 | 22.7 | 162.8 | 867.4 | 12.7 | 6.9  | 250.0 |  |
| % Microplanktonic community (abundance)                                                                                  |      |      |       |       |      |      |       |       |      |      |       |       |      |      |       |  |
| Diatoms                                                                                                                  | 61.6 | 44.7 | 86.5  | 89.0  | 62.9 | 68.8 | 89.7  | 86.1  | 72.0 | 79.3 | 66.7  | 90.8  | 66.7 | 34.6 | 78.3  |  |
| Dinoflagellates                                                                                                          | 25.2 | 22.3 | 9.4   | 9.5   | 27.3 | 23.1 | 7.7   | 11.9  | 21.3 | 16.1 | 29.5  | 8.0   | 18.0 | 59.7 | 12.5  |  |
| Grazers                                                                                                                  | 1.4  | 13.4 | 2.0   | 0.9   | 4.2  | 1.1  | 0.5   | 0.5   | 3.9  | 2.2  | 1.0   | 0.3   | 3.3  | 4.1  | 4.6   |  |
| % Microplanktonic community (biovolume)                                                                                  |      |      |       |       |      |      |       |       |      |      |       |       |      |      |       |  |
| Diatoms                                                                                                                  | 28.1 | 8.7  | 87.7  | 88.4  | 35.3 | 28.6 | 84.6  | 63.8  | 33.5 | 38.5 | 40.2  | 93.0  | 26.5 | 7.7  | 68.0  |  |
| Dinoflagellates                                                                                                          | 20.9 | 49.9 | 2.4   | 3.5   | 16.3 | 19.2 | 4.9   | 16.3  | 24.1 | 11.5 | 27.6  | 1.9   | 15.0 | 44.6 | 10.9  |  |
| Grazers                                                                                                                  | 31.4 | 31.0 | 8.9   | 5.4   | 41.0 | 29.1 | 8.9   | 17.1  | 35.3 | 39.7 | 27.6  | 1.4   | 52.5 | 31.6 | 16.6  |  |

Table S2. Cont.

| Neap Tides                                |      |       |      |       |      |       |      |       |       |       |      |      |      |      |      |
|-------------------------------------------|------|-------|------|-------|------|-------|------|-------|-------|-------|------|------|------|------|------|
| Stations                                  | 1    | 5     | 6    | 8     | 9    | 10    | 14   | 19    | 23    | 24    | 25   | 26   | 28   | 36   | 41   |
| <i>p</i> PUAs from cells from 1 L         |      |       |      |       |      |       |      |       |       |       |      |      |      |      |      |
| <b>HD</b>                                 | 1.1  | 0.03  | 1.6  | 0.8   | 0.5  | 0.4   | 0.9  | 1.4   | 0.002 | 0     | 1.5  | 3.1  | 0.01 | 1.2  | 1.1  |
| <b>OD</b>                                 | 1.1  | 0.001 | 1.5  | 0.02  | 0.02 | 0.000 | 0.3  | 0.04  | 0.02  | 0.01  | 0.3  | 1.7  | 0.02 | 0.1  | 1.3  |
| <b>DD</b>                                 | 3.0  | 0.01  | 5.7  | 1.0   | 1.2  | 0.01  | 1.9  | 2.0   | 0.3   | 0.5   | 4.9  | 4.9  | 0.5  | 0.3  | 2.4  |
| <b>Total PUAs</b>                         | 5.4  | 0.04  | 8.8  | 1.8   | 1.8  | 0.4   | 3.2  | 3.5   | 0.3   | 0.5   | 6.8  | 9.8  | 0.5  | 1.7  | 5.0  |
| PUAs per cells (fmol cell <sup>-1</sup> ) |      |       |      |       |      |       |      |       |       |       |      |      |      |      |      |
| <b>HD</b>                                 | 0.9  | 0.08  | 0.2  | 0.1   | 0.4  | 0.9   | 0.08 | 0.2   | 0.002 | 0.006 | 0.8  | 0.5  | 0.01 | 5.3  | 1.1  |
| <b>OD</b>                                 | 1.0  | 0.003 | 0.2  | 0.004 | 0.02 | 0.002 | 0.03 | 0.007 | 0.01  | 0.01  | 0.1  | 0.3  | 0.04 | 0.7  | 1.3  |
| <b>DD</b>                                 | 2.6  | 0.04  | 0.9  | 0.1   | 0.9  | 0.03  | 0.1  | 0.3   | 0.3   | 0.6   | 2.6  | 0.9  | 0.8  | 1.3  | 2.4  |
| <b>Total PUAs</b>                         | 4.6  | 0.1   | 1.4  | 0.2   | 1.4  | 0.9   | 0.2  | 0.6   | 0.3   | 0.6   | 3.6  | 1.8  | 0.9  | 7.3  | 4.8  |
| Chlorophyll (µg L <sup>-1</sup> )         |      |       |      |       |      |       |      |       |       |       |      |      |      |      |      |
| <b>Chla &gt; 20 µm</b>                    | 0.03 | 0.002 | 0.2  | 0.1   | 0.05 | 0.03  | 0.1  | 0.2   | 0.1   | 0.04  | 0.1  | 0.2  | 0    | 0.01 | 0.2  |
| <b>Chla Total</b>                         | 0.6  | 0.2   | 0.6  | 1.2   | 0.9  | 0.7   | 0.5  | 0.9   | 0.9   | 0.5   | 1.1  | 1.8  | 0.5  | 0.2  | 0.6  |
| <b>% Active Chlorophyll</b>               | 0    | 0     | 36.3 | 31.1  | 0    | 20.1  | 0    | 0     | 14.3  | 0     | 0    | 27.7 | 0    | 0    | 0    |
| Nutrients (µM)                            |      |       |      |       |      |       |      |       |       |       |      |      |      |      |      |
| <b>Nitrate</b>                            | 0.1  | 0     | 0    | 0.8   | 0    | 0.09  | 1.1  | 1.9   | 2.0   | 0     | 0.05 | 1.3  | 1.0  | 0    | 0.09 |
| <b>Phosphate</b>                          | nd   | nd    | nd   | nd    | nd   | 0.2   | 0.04 | 0.03  | 0.1   | 0.08  | nd   | nd   | nd   | 0.04 | nd   |
| <b>Silicate</b>                           | 1.7  | 1.6   | 0.7  | 1.1   | 1.2  | 1.4   | 1.6  | 3.5   | 2.8   | 2.9   | 1.3  | 3.3  | 1.6  | 24.1 | 5.3  |

**Figure S1.** Relation between total and fractionated chlorophyll in the sampled stations during Spring tide (red symbols) and Neap tide (Black symbols) regimes.

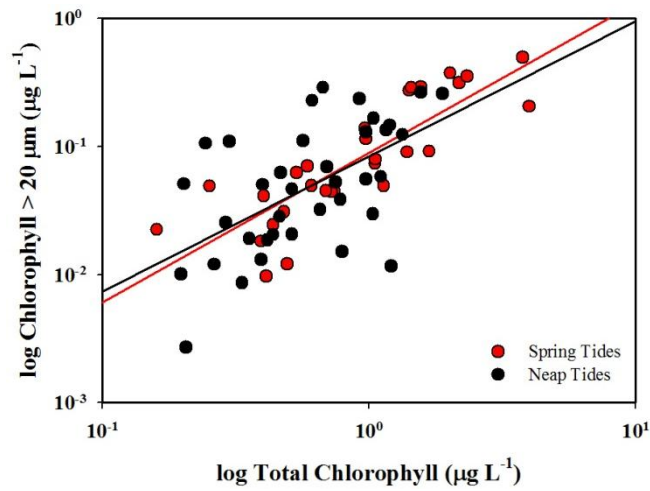

$$[y = 1.16x - 1.05; R^2 = 0.7] \tag{1}$$

$$[y = 1.05x - 1.07; R^2 = 0.3] \tag{2}$$

Main groups used for microplankton classifications. All the images have been selected from the libraries used for the automatic classification. Vignettes presented here were taken with  $\times 40$  and  $\times 100$  magnification so are not comparable in size terms.

### S1. Centrics Single Diatoms

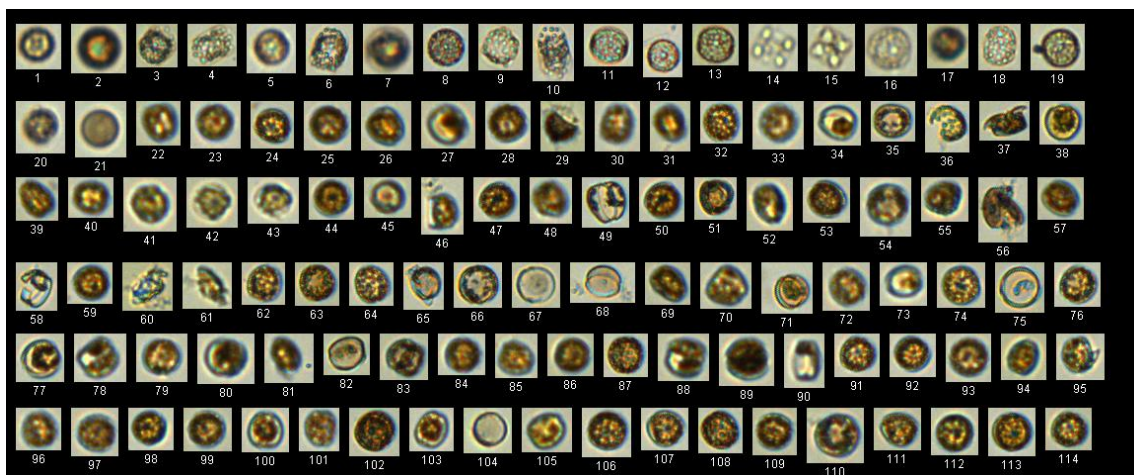

**S2. Pennate Diatoms**

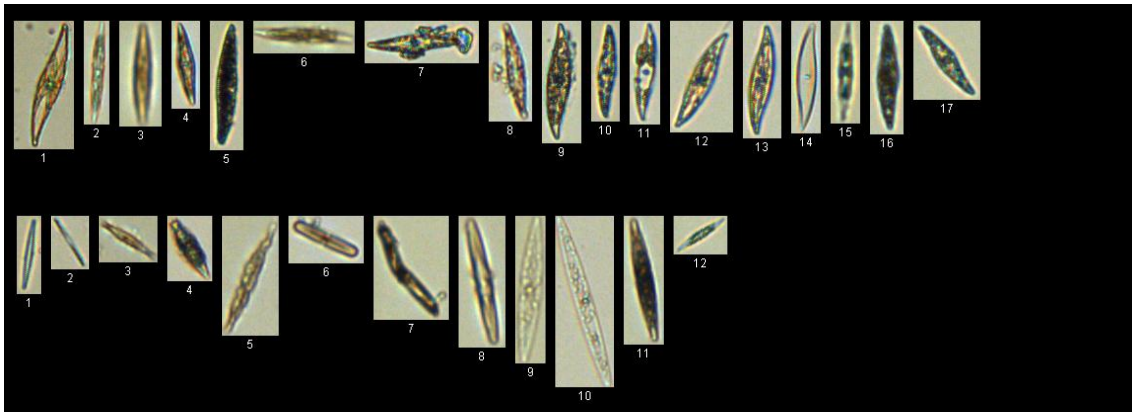

**S3. Lineal Small Cells Chains**

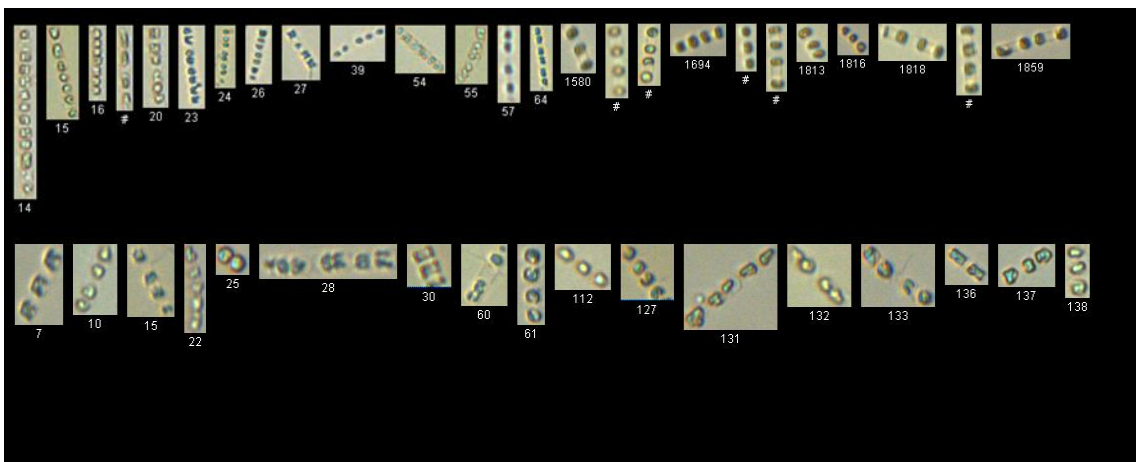

**S4. Large Individual and Lineal Chains of Large Cells**

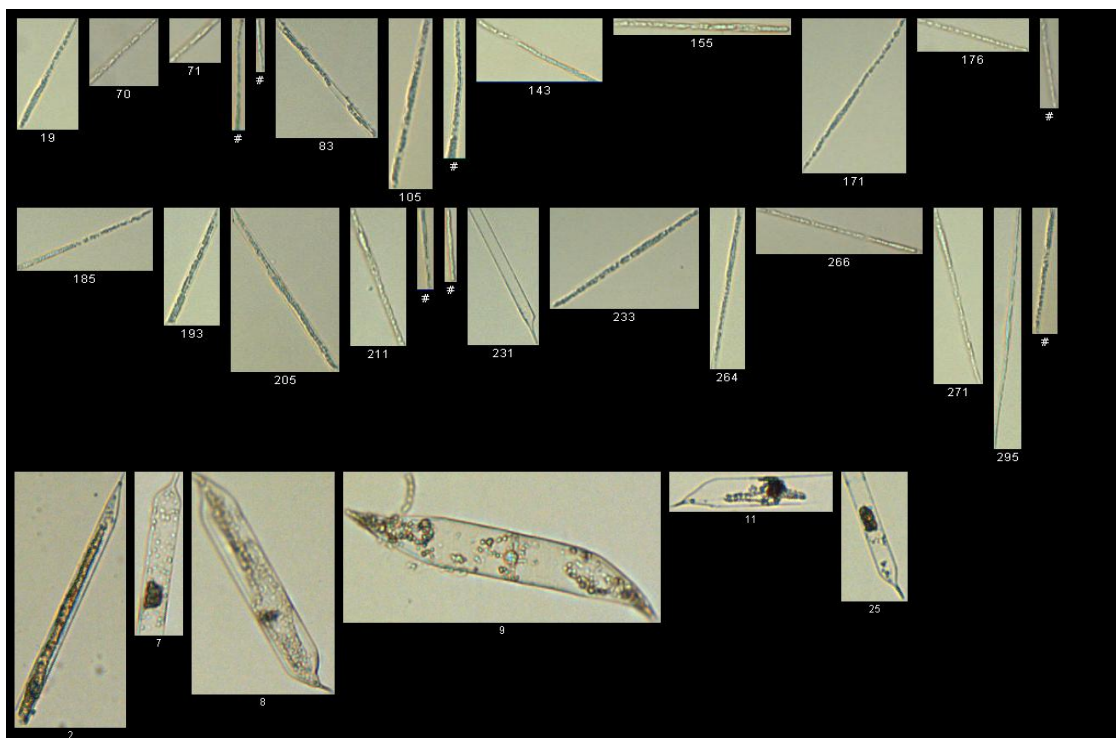

**S5. Helical Chains**

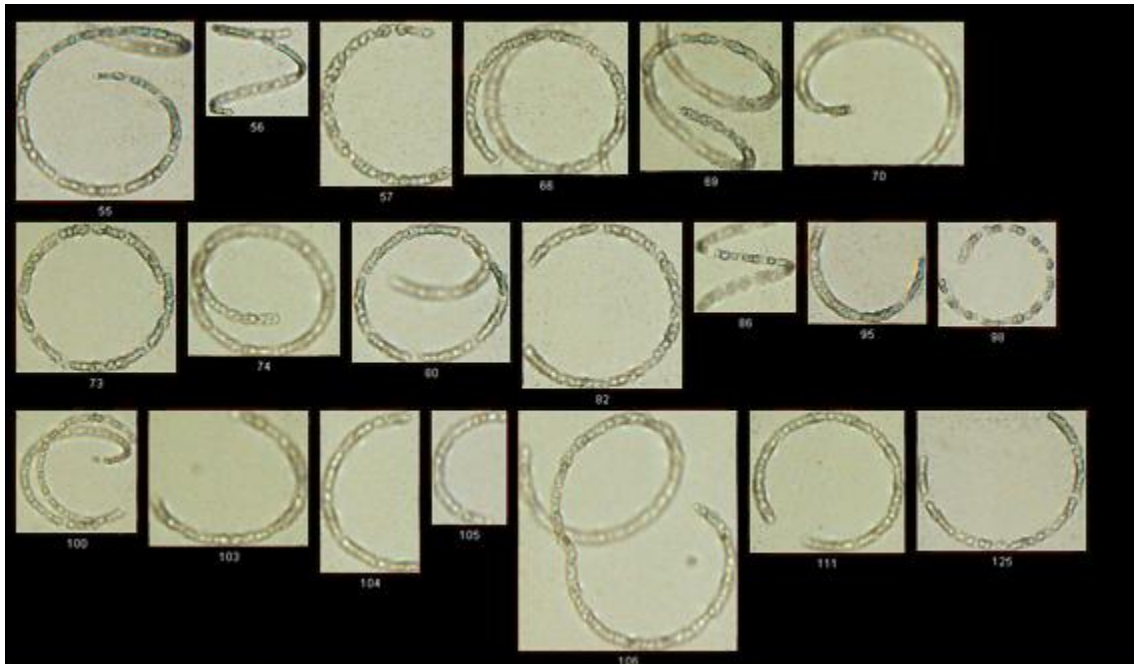

**S6. Dinoflagellates**

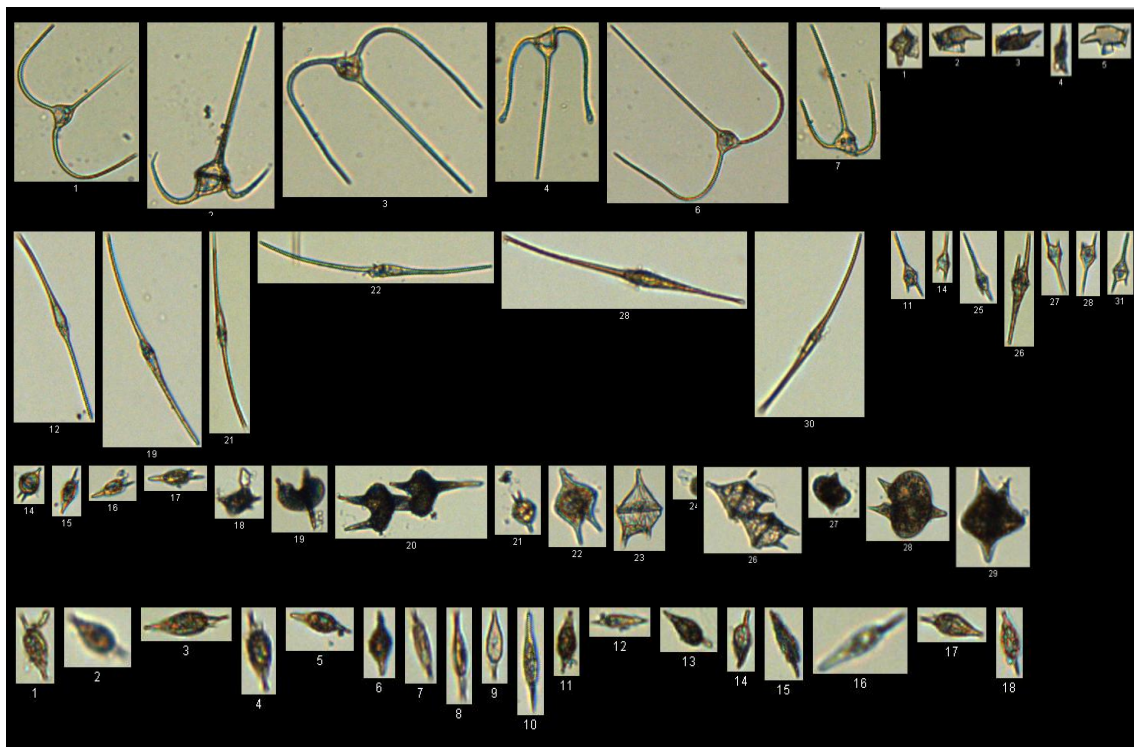

**S7. Foraminifera**

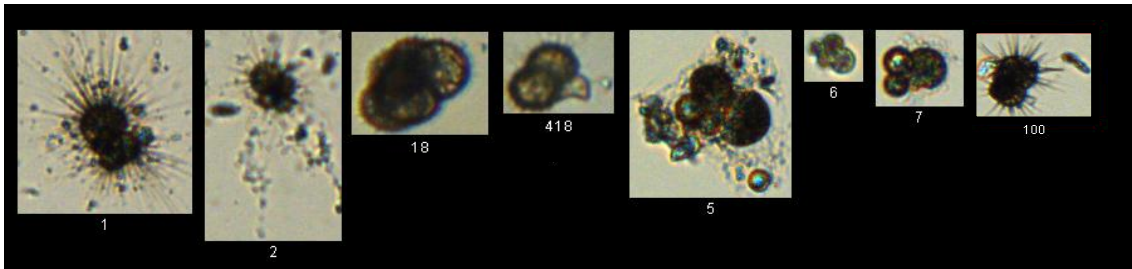

**S8. Silicoflagellata**

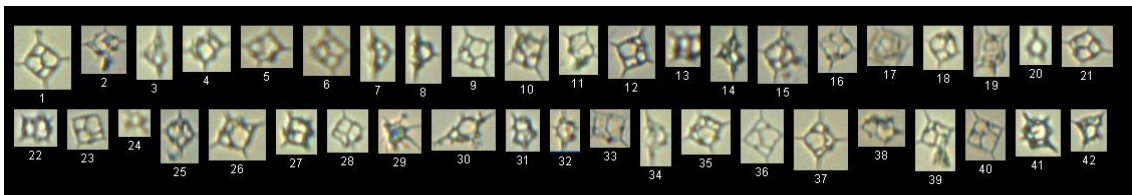

**S9. Zooplankton (Copepods + Tintinnids)**

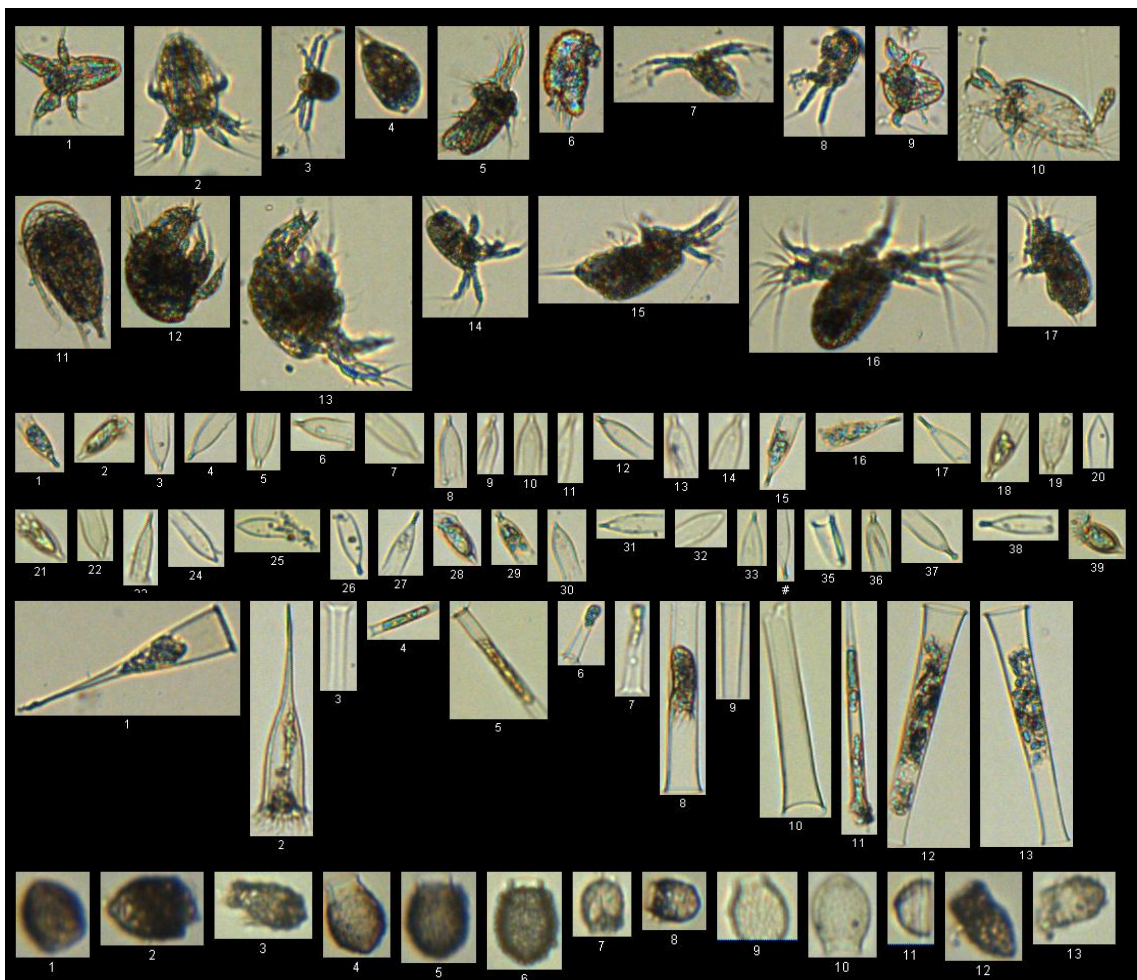

Supplement: marinedrugs-12-01438-s001.pdf [file marinedrugs-12-01438-s001.pdf]
